# Supplementary material
Source: Royal Society of Chemistry journal article supplement (doi:10.1039/d6cp00651e)

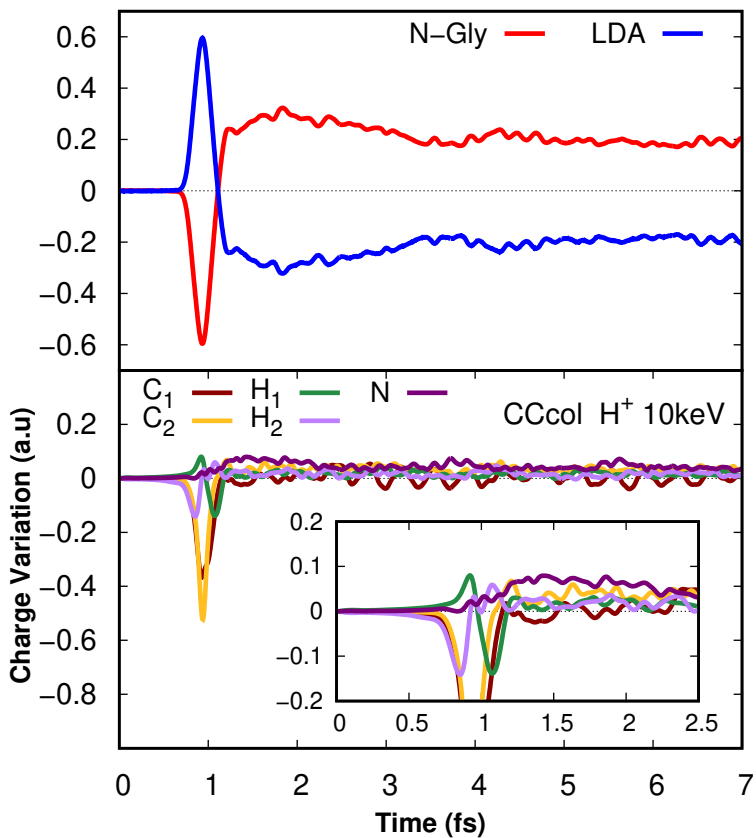

Supplement: d6cp00651e1.zip [file FigureS10a.Gly-TOTALCharge_Variation_CCcol_0.01MeV_paperRevisionClean.pdf › ESI figures/FigureS10a.Gly-TOTALCharge_Variation_CCcol_0.01MeV_paperRevisionClean.pdf]

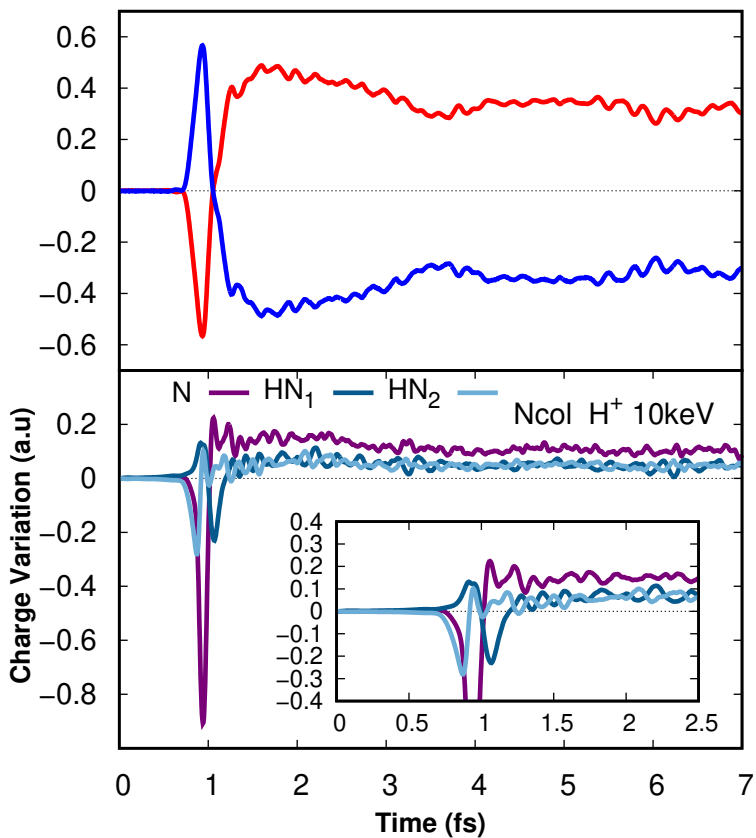

Supplement: d6cp00651e1.zip [file FigureS10b.Gly-TOTALCharge_Variation_Ncol_0.01MeV_paperRevisionClean.pdf › ESI figures/FigureS10b.Gly-TOTALCharge_Variation_Ncol_0.01MeV_paperRevisionClean.pdf]

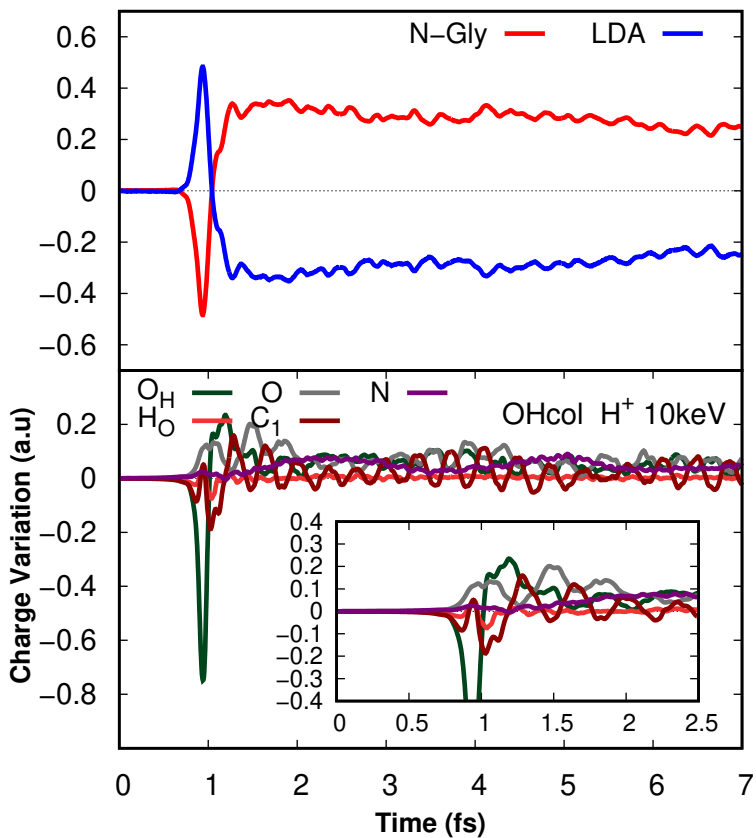

Supplement: d6cp00651e1.zip [file FigureS10c.Gly-TOTALCharge_Variation_OHcol_0.01MeV_paperRevisionClean.pdf › ESI figures/FigureS10c.Gly-TOTALCharge_Variation_OHcol_0.01MeV_paperRevisionClean.pdf]

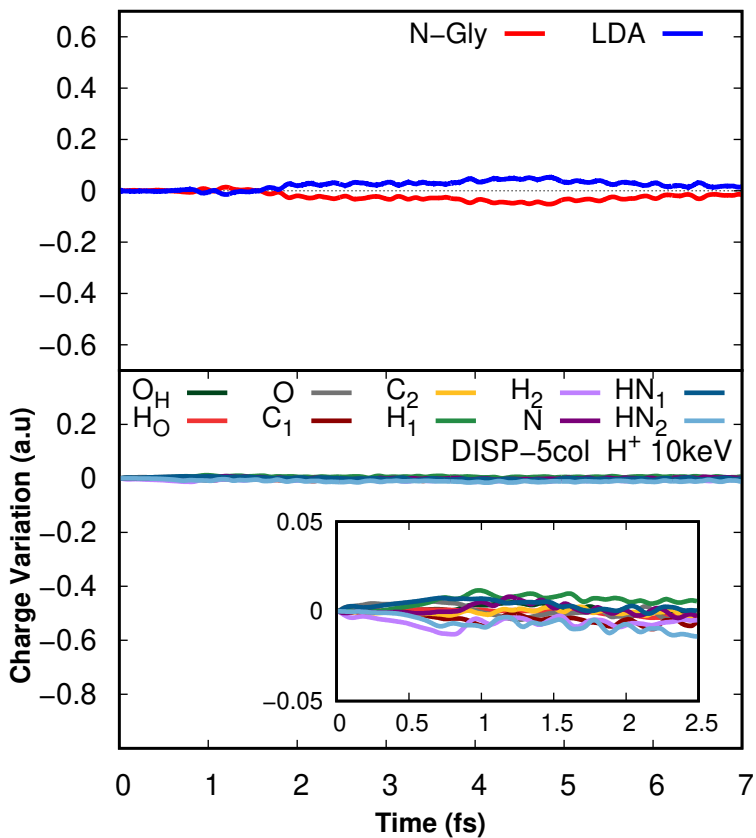

Supplement: d6cp00651e1.zip [file FigureS10d.Gly-TOTALCharge_Variation_DISP5col_0.01MeV_paperRevisionClean.pdf › ESI figures/FigureS10d.Gly-TOTALCharge_Variation_DISP5col_0.01MeV_paperRevisionClean.pdf]

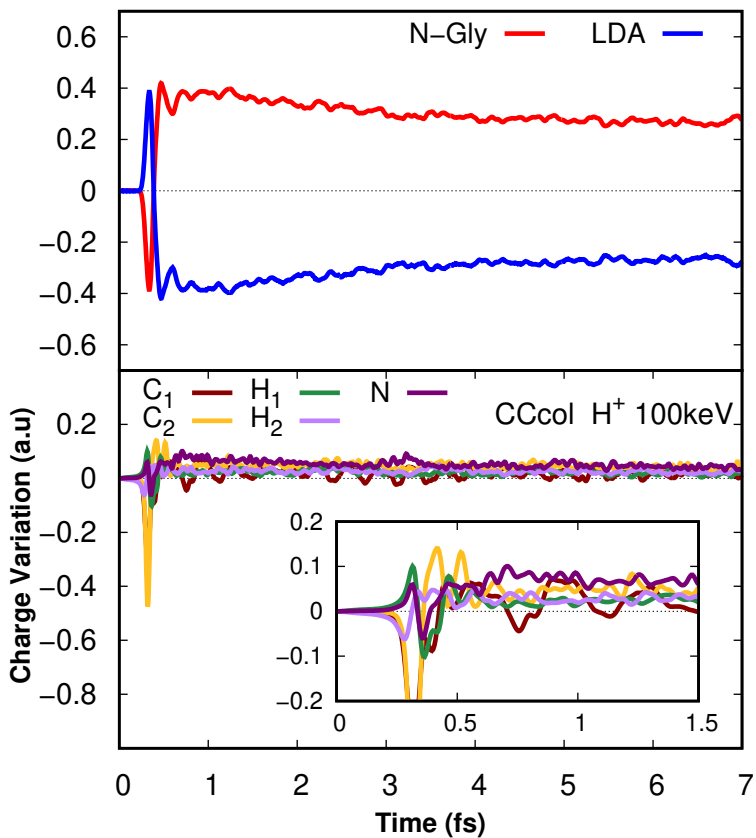

Supplement: d6cp00651e1.zip [file FigureS11a.Gly-TOTALCharge_Variation_CCcol_0.1MeV_paperRevisionClean.pdf › ESI figures/FigureS11a.Gly-TOTALCharge_Variation_CCcol_0.1MeV_paperRevisionClean.pdf]

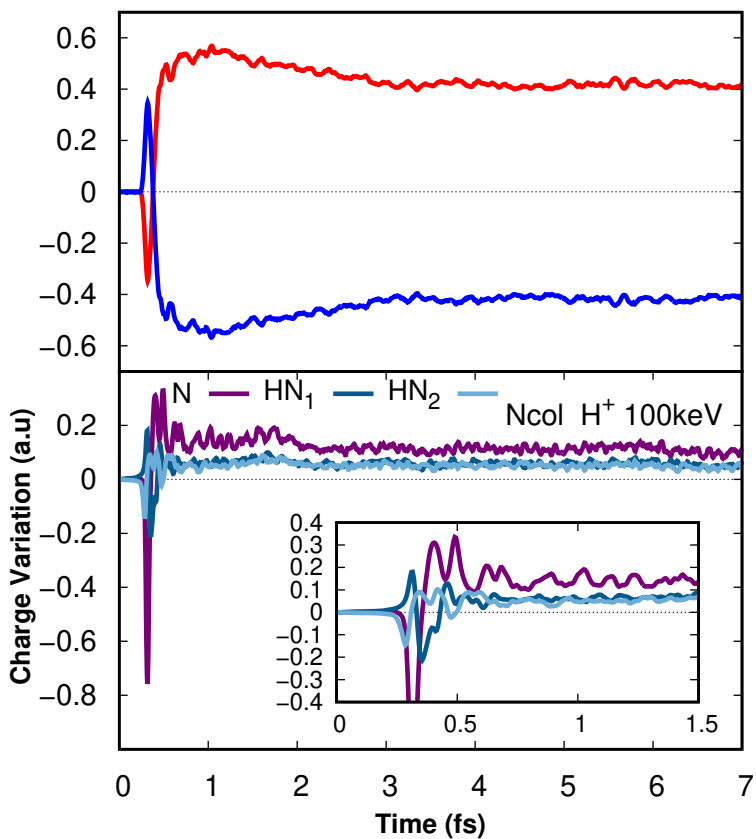

Supplement: d6cp00651e1.zip [file FigureS11b.Gly-TOTALCharge_Variation_Ncol_0.1MeV_paperRevisionClean.pdf › ESI figures/FigureS11b.Gly-TOTALCharge_Variation_Ncol_0.1MeV_paperRevisionClean.pdf]

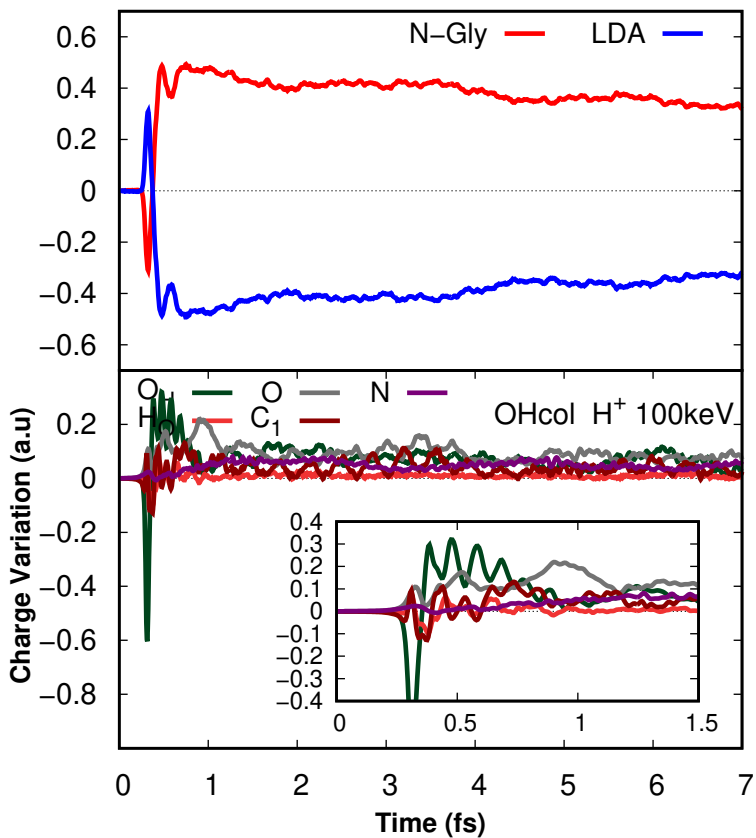

Supplement: d6cp00651e1.zip [file FigureS11c.Gly-TOTALCharge_Variation_OHcol_0.1MeV_paperRevisionClean.pdf › ESI figures/FigureS11c.Gly-TOTALCharge_Variation_OHcol_0.1MeV_paperRevisionClean.pdf]

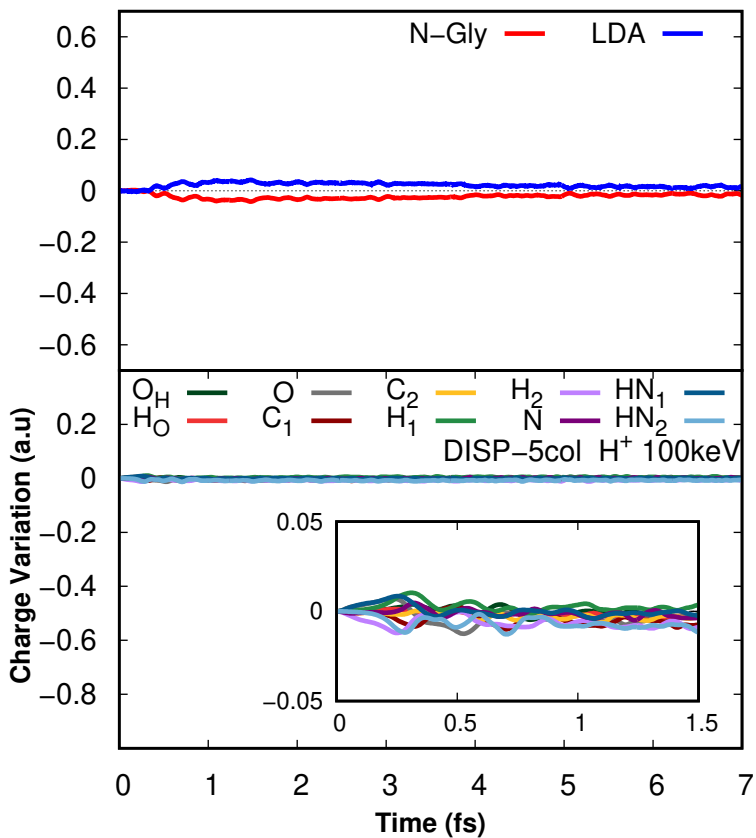

Supplement: d6cp00651e1.zip [file FigureS11d.Gly-TOTALCharge_Variation_DISP5col_0.1MeV_paperRevisionClean.pdf › ESI figures/FigureS11d.Gly-TOTALCharge_Variation_DISP5col_0.1MeV_paperRevisionClean.pdf]

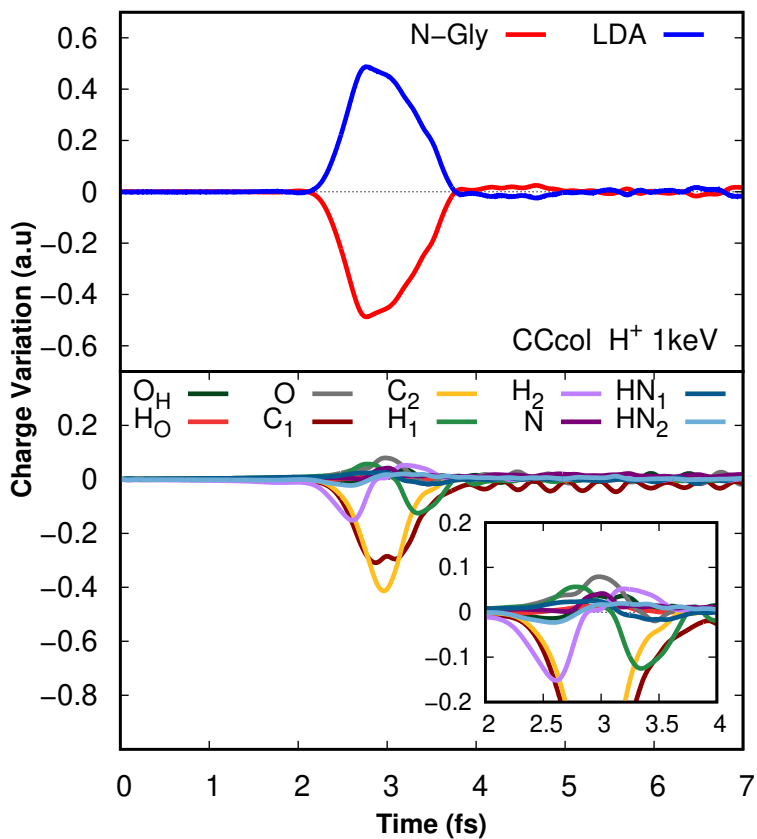

Supplement: d6cp00651e1.zip [file FigureS7a.Gly-TOTALCharge_Variation_CCcol_0.001MeV_paperRevision.pdf › ESI figures/FigureS7a.Gly-TOTALCharge_Variation_CCcol_0.001MeV_paperRevision.pdf]

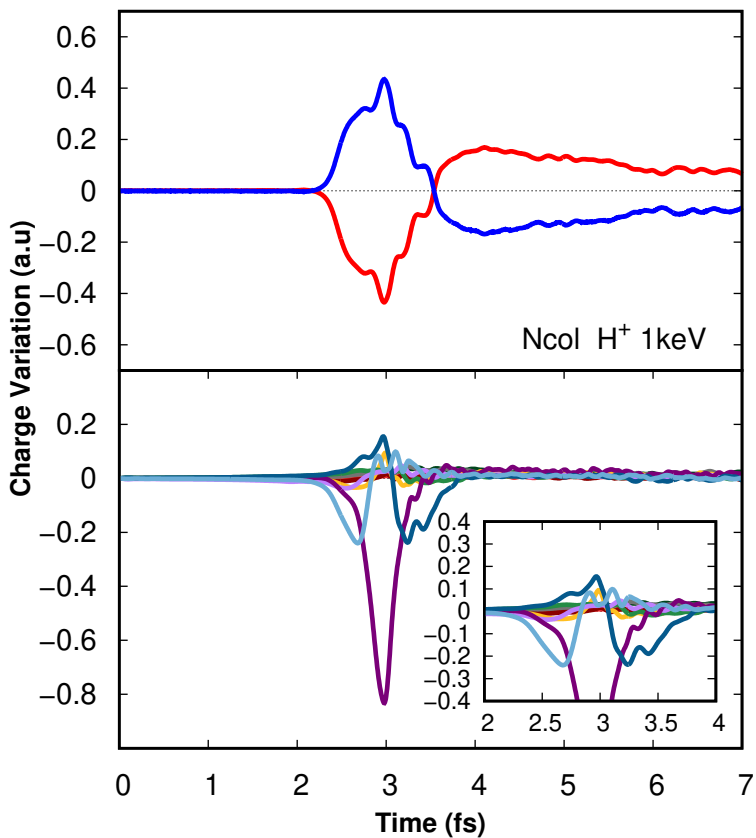

Supplement: d6cp00651e1.zip [file FigureS7b.Gly-TOTALCharge_Variation_Ncol_0.001MeV_paperRevision.pdf › ESI figures/FigureS7b.Gly-TOTALCharge_Variation_Ncol_0.001MeV_paperRevision.pdf]

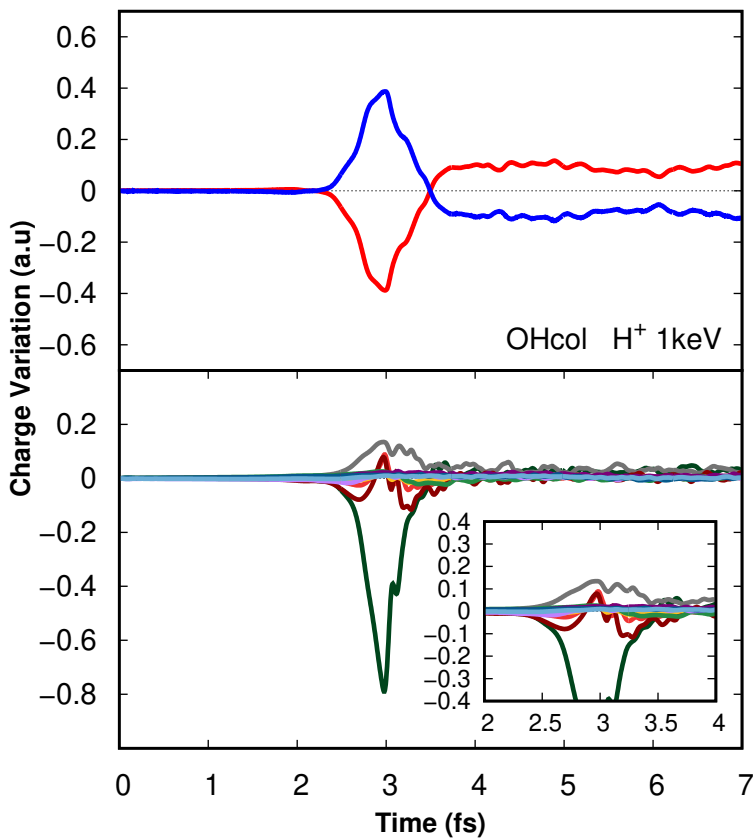

Supplement: d6cp00651e1.zip [file FigureS7c.Gly-TOTALCharge_Variation_OHcol_0.001MeV_paperRevision.pdf › ESI figures/FigureS7c.Gly-TOTALCharge_Variation_OHcol_0.001MeV_paperRevision.pdf]

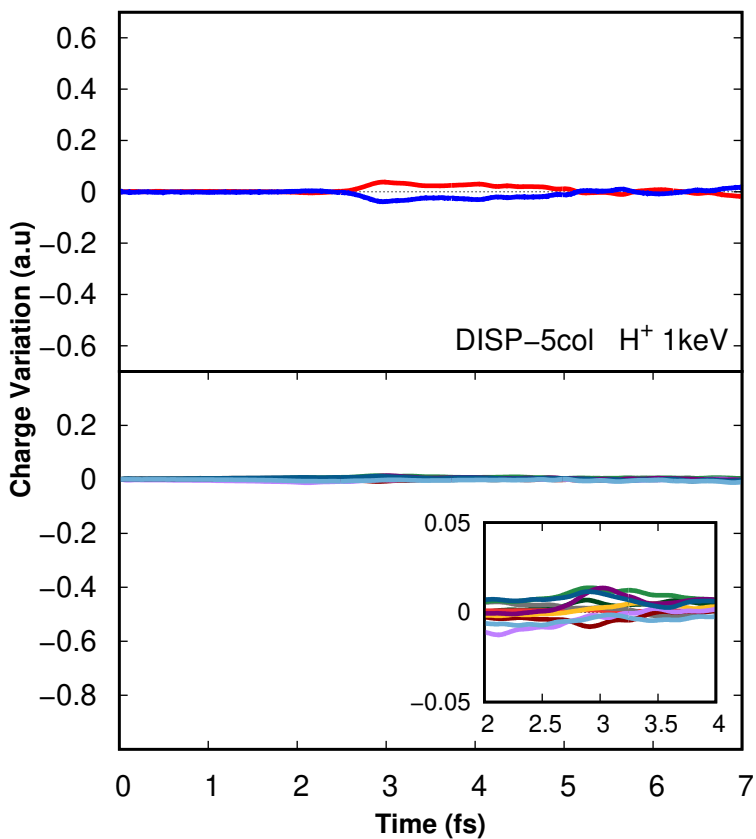

Supplement: d6cp00651e1.zip [file FigureS7d.Gly-TOTALCharge_Variation_DISP5col_0.001MeV_paperRevision.pdf › ESI figures/FigureS7d.Gly-TOTALCharge_Variation_DISP5col_0.001MeV_paperRevision.pdf]

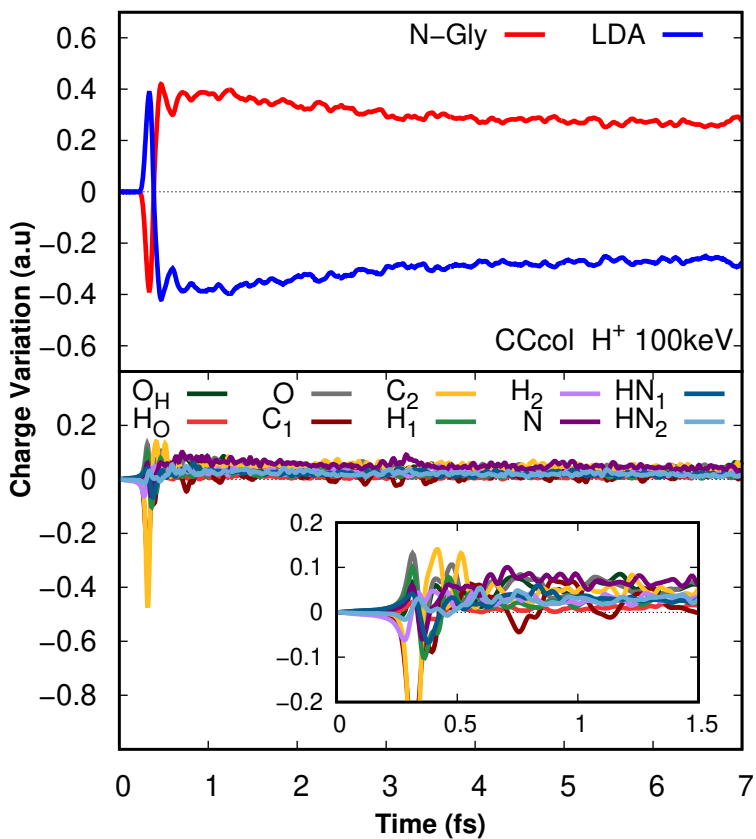

Supplement: d6cp00651e1.zip [file FigureS8a.Gly-TOTALCharge_Variation_CCcol_0.1MeV_paperRevision.pdf › ESI figures/FigureS8a.Gly-TOTALCharge_Variation_CCcol_0.1MeV_paperRevision.pdf]

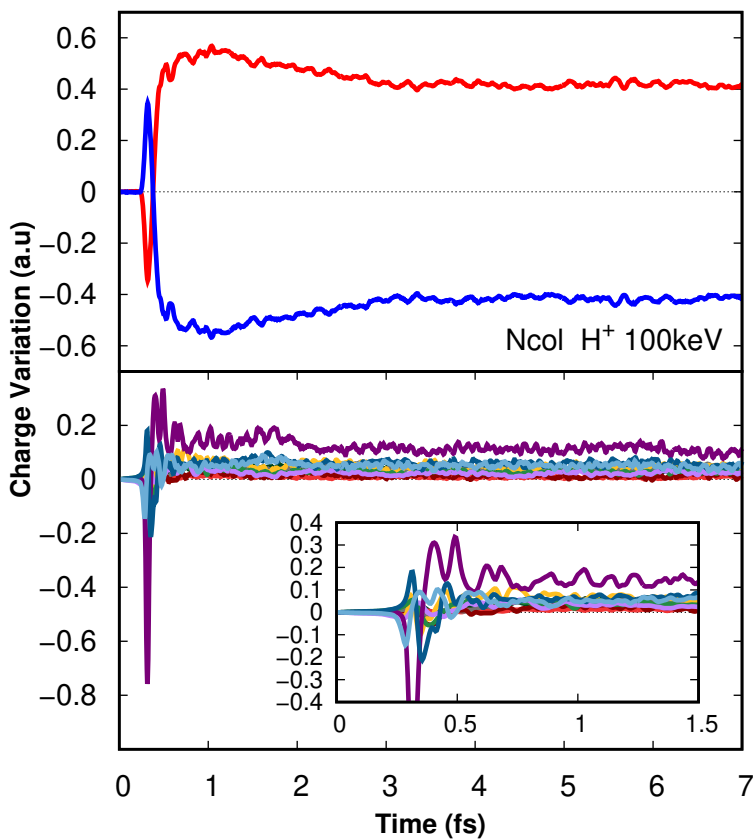

Supplement: d6cp00651e1.zip [file FigureS8b.Gly-TOTALCharge_Variation_Ncol_0.1MeV_paperRevision.pdf › ESI figures/FigureS8b.Gly-TOTALCharge_Variation_Ncol_0.1MeV_paperRevision.pdf]

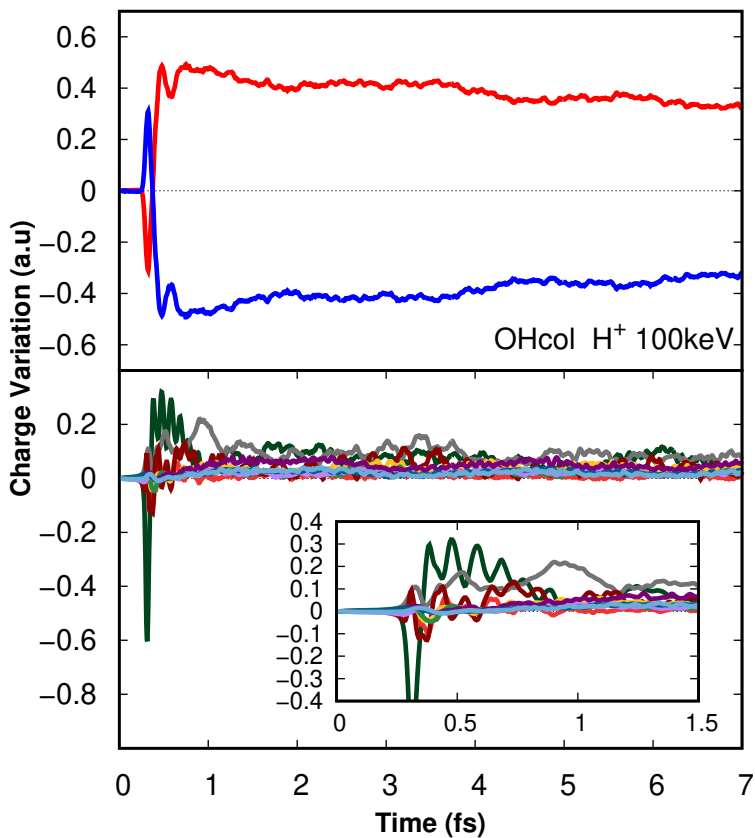

Supplement: d6cp00651e1.zip [file FigureS8c.Gly-TOTALCharge_Variation_OHcol_0.1MeV_paperRevision.pdf › ESI figures/FigureS8c.Gly-TOTALCharge_Variation_OHcol_0.1MeV_paperRevision.pdf]

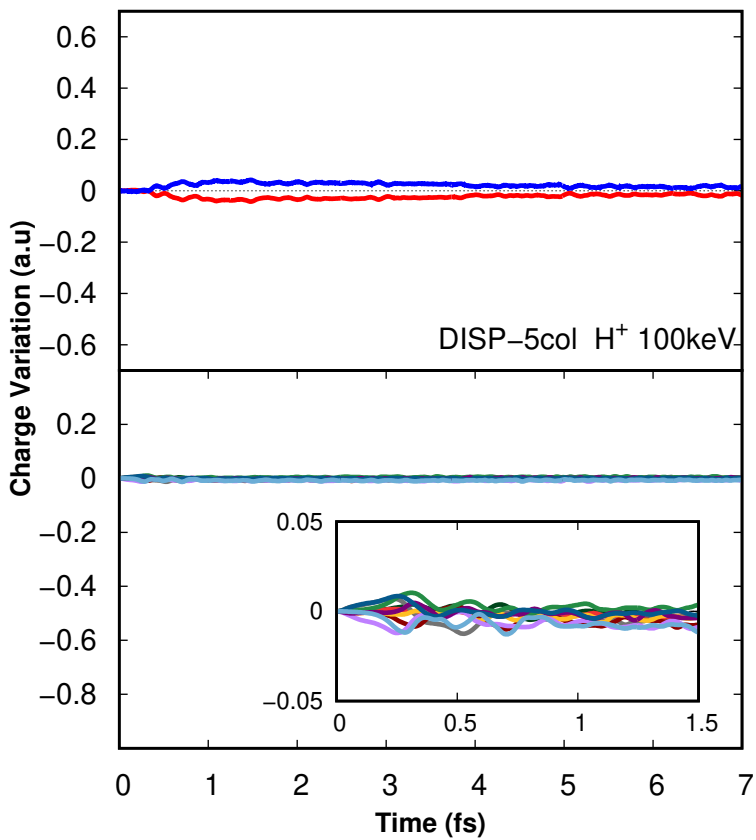

Supplement: d6cp00651e1.zip [file FigureS8d.Gly-TOTALCharge_Variation_DISP5col_0.1MeV_paperRevision.pdf › ESI figures/FigureS8d.Gly-TOTALCharge_Variation_DISP5col_0.1MeV_paperRevision.pdf]

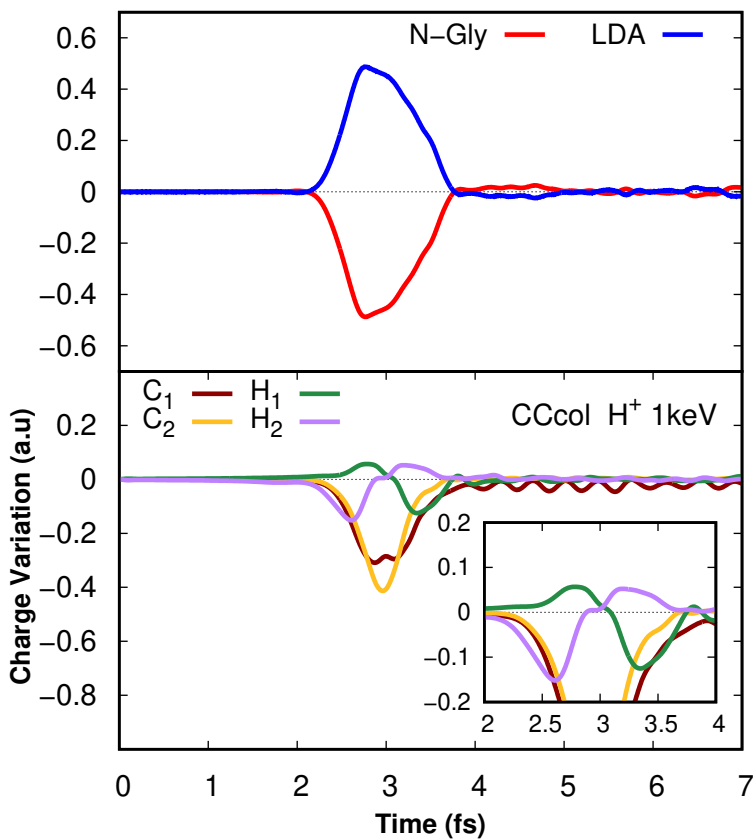

Supplement: d6cp00651e1.zip [file FigureS9a.Gly-TOTALCharge_Variation_CCcol_0.001MeV_paperRevisionClean.pdf › ESI figures/FigureS9a.Gly-TOTALCharge_Variation_CCcol_0.001MeV_paperRevisionClean.pdf]

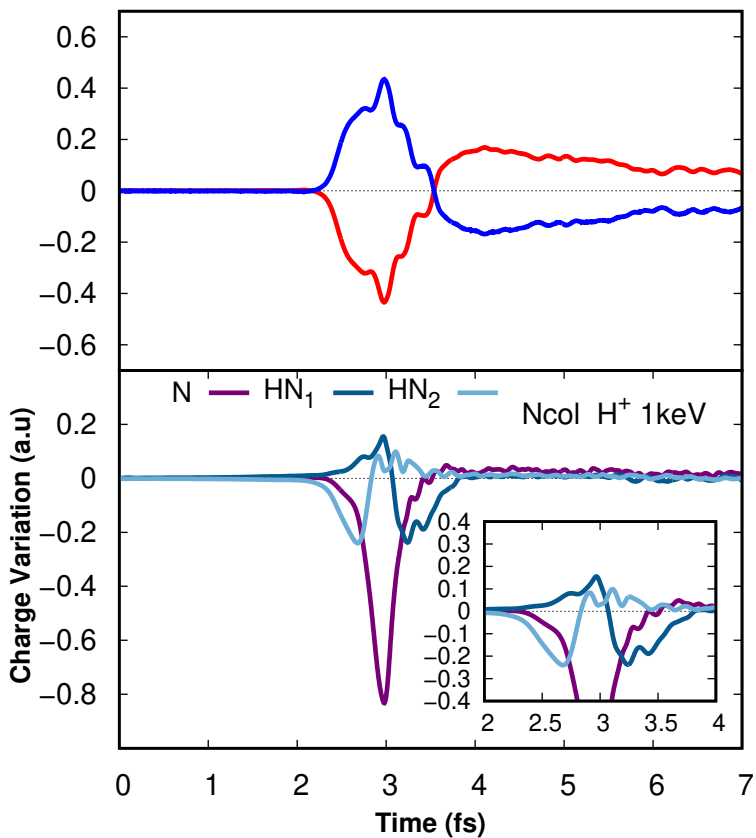

Supplement: d6cp00651e1.zip [file FigureS9b.Gly-TOTALCharge_Variation_Ncol_0.001MeV_paperRevisionClean.pdf › ESI figures/FigureS9b.Gly-TOTALCharge_Variation_Ncol_0.001MeV_paperRevisionClean.pdf]

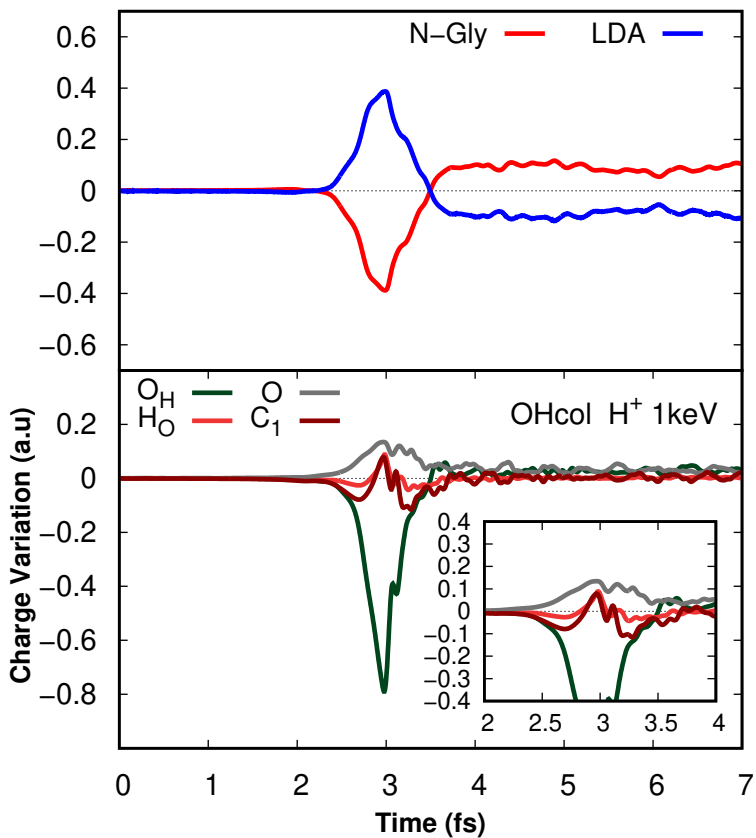

Supplement: d6cp00651e1.zip [file FigureS9c.Gly-TOTALCharge_Variation_OHcol_0.001MeV_paperRevisionClean.pdf › ESI figures/FigureS9c.Gly-TOTALCharge_Variation_OHcol_0.001MeV_paperRevisionClean.pdf]

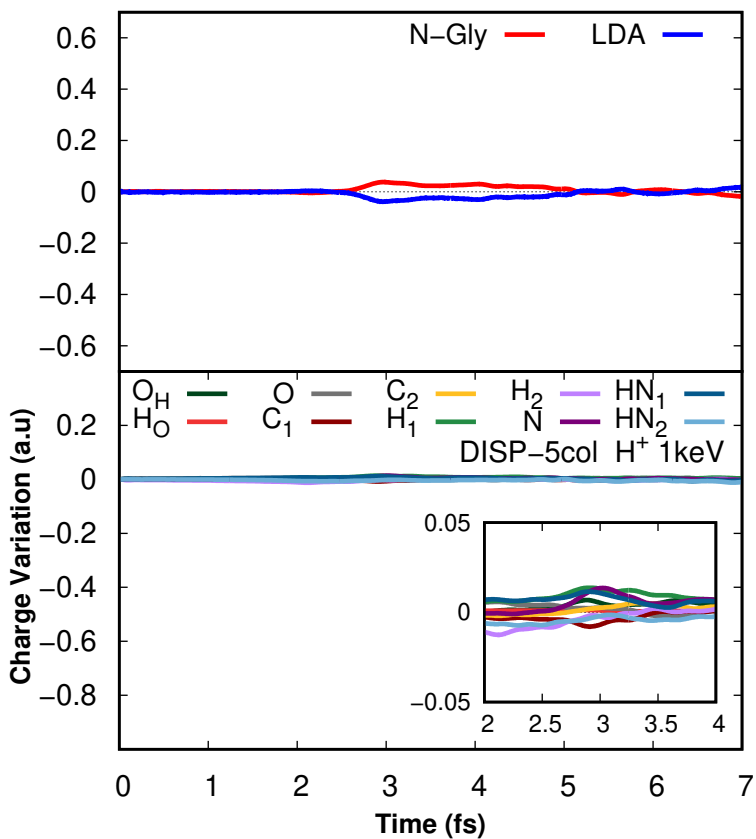

Supplement: d6cp00651e1.zip [file FigureS9d.Gly-TOTALCharge_Variation_DISP5col_0.001MeV_paperRevisionClean.pdf › ESI figures/FigureS9d.Gly-TOTALCharge_Variation_DISP5col_0.001MeV_paperRevisionClean.pdf]
